# Supplementary material for: Microfluidic co-culture system for cancer migratory analysis and anti-metastatic drugs screening
Source: PubMed Central journal article supplement (PMC5071858; doi:10.1038/srep35544), 2016-10-20
Supplement: srep35544-s1.pdf [file srep35544-s1.pdf]

# Supplementary information for

## **Microfluidic co-culture system for cancer migratory analysis and anti-metastatic drugs screening**

Shengli Mi,<sup>a,e+</sup> Zhichang Du,<sup>a+</sup> Yuanyuan Xu,<sup>a</sup> Zhengjie Wu,<sup>a</sup> Xiang Qian,<sup>a</sup> Min Zhang,<sup>a</sup> Wei Sun<sup>a,b,c,d\*</sup>

<sup>a</sup> *Graduate School at Shenzhen, Tsinghua University, Shenzhen, P. R. China. E-mail: weisun@mail.tsinghua.edu.cn; Tel: +8675526036329; Fax: 8675526036356*

<sup>b</sup> *Department of Mechanical Engineering and Mechanics, Tsinghua University, Beijing, China.*

<sup>c</sup> *Department of Mechanical Engineering, Drexel University, Philadelphia, PA, USA.*

<sup>d</sup> *Tsinghua-Berkeley Shenzhen Institute, Shenzhen, P. R. China.*

<sup>e</sup> *Open FIESTA Center, Tsinghua University, Shenzhen 518055, PR China*

*\*These authors contributed equally to this work.*

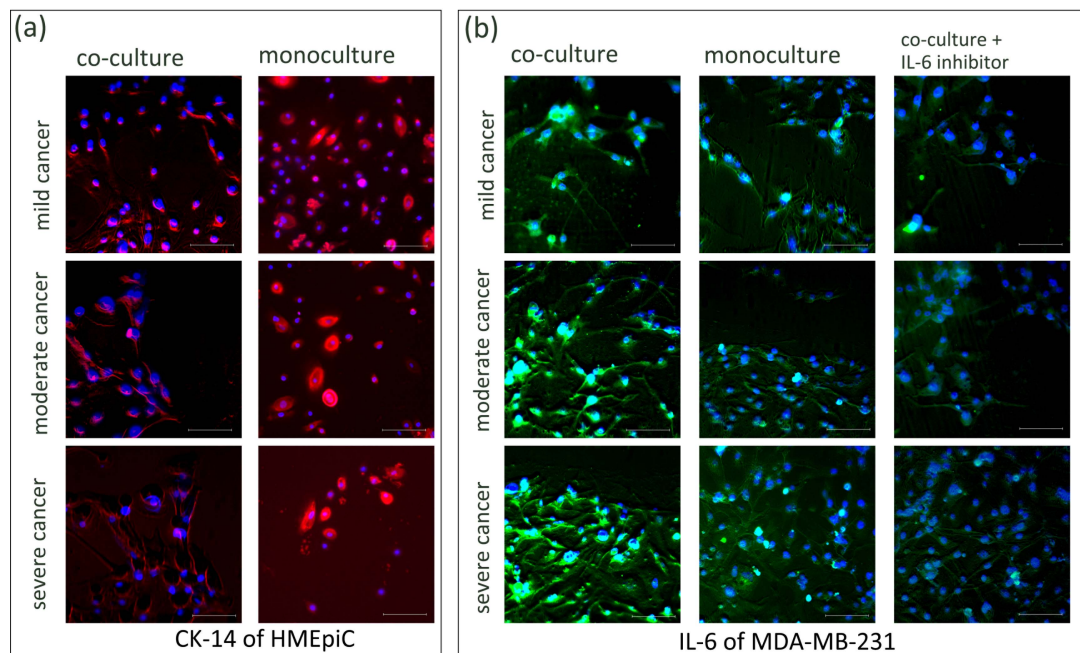

**Supplementary Fig. S1.** (a) Immunofluorescence images of CK-14 (in red) of HMEpiC cells under co-culture and monoculture conditions in three cancer models. (b) Immunofluorescence images of IL-6 (in green) of MDA-MB-231 cells under co-culture, monoculture and IL-6 inhibitor conditions in three cancer models. All of the optical images have the same scale bar: 100  $\mu\text{m}$ , the nucleus is in blue.

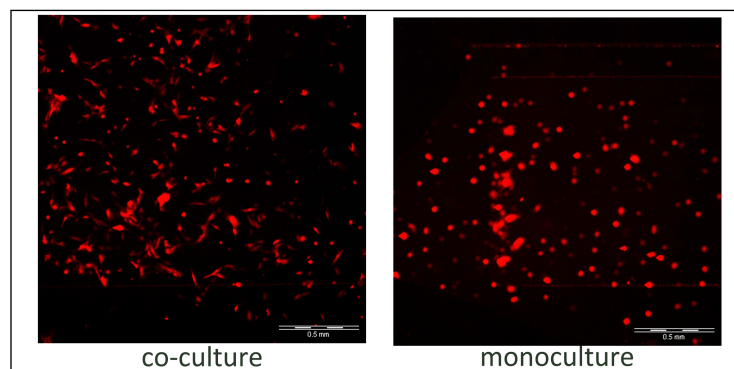

**Supplementary Fig. S2.** Morphological characteristics of HMEpiC cells in co-culture condition and monoculture condition. HMEpiC cells in red were transfected with RFP and cultured in moderate cancer model. The optical images have the same scale bar: 500  $\mu\text{m}$ .

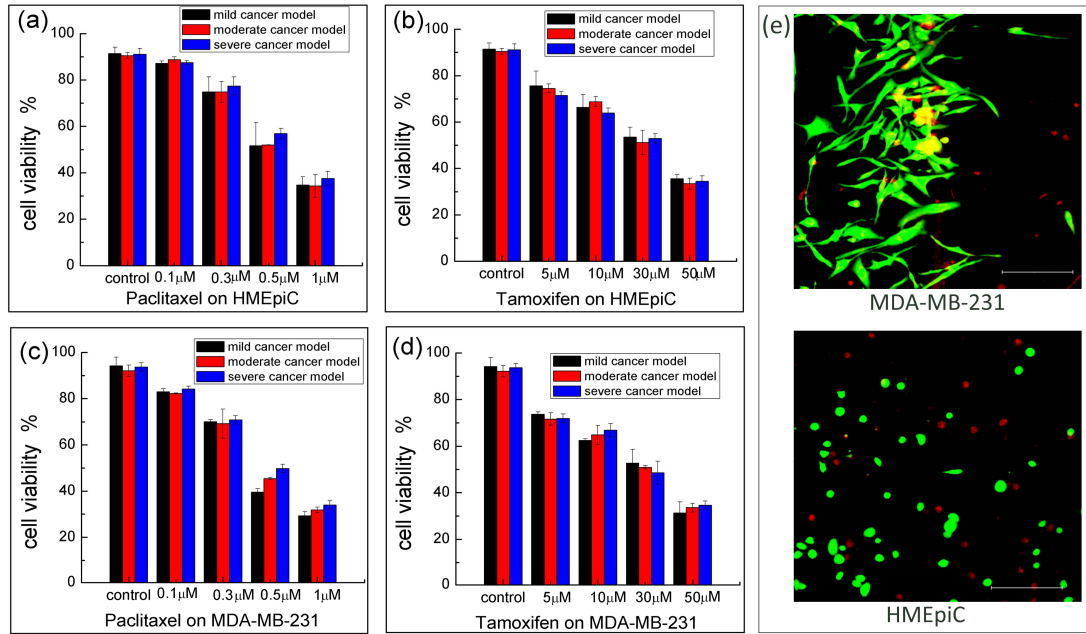

**Supplementary Fig. S3.** (a-d) Statistical analysis of the cell viability of the MDA-MB-231 or HMEpiC cells at different concentrations of paclitaxel or tamoxifen, respectively. The error bars stand for the standard deviations calculated from separate assays (n=4). (e) The merged images of the live/dead staining images of the MDA-MB-231 and HMEpiC cells. The sample of images was at 10  $\mu$ M tamoxifen in the moderate cancer model. The optical images have the same scale bar: 200  $\mu$ m.

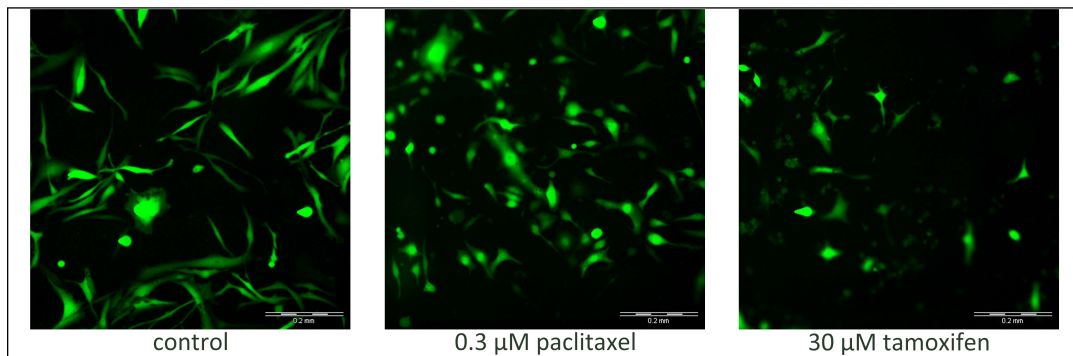

**Supplementary Fig. S4.** Morphological characteristics of MDA-MB-231 without or with anti-cancer drugs treatment. MDA-MB-231 cells in green were transfected with GFP and cultured in moderate cancer model. The optical images have the same scale bar: 200  $\mu$ m.
